# Supplementary material
Source: HighWire-hosted journal article supplement (http://www.ajnr.org/highwire/filestream/52628/field_highwire_adjunct_files/0/14-01116.pdf)
Supplement: 14-01116.pdf [file 14-01116.pdf]

**On-line Table 1: Chordoid meningiomas**

| Location                   | Size (cm) | T1         | T2/FLAIR   | Peritumoral<br>Edema | Cystic<br>Necrosis | Bone<br>Invasion | DWI | ADC <sup>a</sup> | NADC <sup>b</sup> |             |
|----------------------------|-----------|------------|------------|----------------------|--------------------|------------------|-----|------------------|-------------------|-------------|
|                            |           | Appearance | Appearance |                      |                    |                  |     |                  |                   | Enhancement |
| R frontal convexity        | 2.5 × 1.5 | Iso        | Hyper      | Avid homo            | +                  | —                | —   | NA               | NA                | NA          |
| R parietal convexity       | 4.0 × 4.5 | Iso        | Hyper      | Avid hetero          | +++                | +                | —   | Hyper            | Hyper             | >1.0        |
| L frontal parafalcine      | 3.0 × 4.0 | Iso        | Hyper      | Avid homo            | —                  | —                | —   | NA               | NA                | NA          |
| L sphenoid wing            | 4.6 × 4.0 | Iso        | Hyper      | Avid homo            | —                  | —                | +   | Hyper            | NA                | NA          |
| L frontoparietal convexity | 6.7 × 3.2 | Iso        | Hyper      | Avid homo            | +++                | —                | —   | Iso              | 1.49              | 2.04        |
| L frontal convexity        | 2.3 × 0.9 | Iso        | Hyper      | Avid homo            | —                  | —                | —   | Hypo             | 1.47              | 1.99        |
| L tentorium                | 2.7 × 2.8 | Iso        | Hyper      | Avid homo            | —                  | —                | —   | Hypo             | 2.11              | 2.93        |
| R foramen magnum           | 2.1 × 2.3 | Hypo       | Hyper      | Avid hetero          | —                  | +                | —   | Iso              | 1.39              | 1.93        |

**Note:**—hetero indicates heterogeneous; homo, homogeneous; Hyper, hyperintensity; Hypo, hypointensity; Iso, isointensity; L, left; NA, not applicable; R, right; +, mild; + + +, severe; —, absent.

<sup>a</sup> Mean (standard deviation) ADC was 1.62 (0.33).

<sup>b</sup> Mean (standard deviation) NADC was 2.22 (0.47).

**On-line Table 2: WHO grade I meningiomas**

| Subtype               | Location                | Size (cm)  | TI Appearance | T2/FLAIR Appearance | Enhancement | Peritumoral Edema | Cystic Necrosis | Bone Invasion | DWI   | ADC  | NADC  |
|-----------------------|-------------------------|------------|---------------|---------------------|-------------|-------------------|-----------------|---------------|-------|------|-------|
| Angiomatous           | Temporal lobe, left     | 4.8 × 5.7  | Iso           | Iso                 | Avid inhom  | +++               | +               | +             | Hypo  | 1.05 | 1.35  |
| Angiomatous           | Cerebellopontine angle  | 1.4 × 1.0  | Iso           | Hyper               | Avid homo   | -                 | -               | -             | Hyper | 1.08 | 1.35  |
| Angiomatous           | Temporal lobe, right    | 1.5 × 0.7  | Iso           | Iso                 | Avid homo   | -                 | -               | -             | Iso   | 0.87 | 1.12  |
| Angiomatous           | Cerebellopontine angle  | 1.7 × 0.8  | Iso           | Iso                 | Avid homo   | -                 | -               | -             | Iso   | 0.95 | 1.27  |
| Fibroblastic          | Brain, NOS              | 4.5 × 4.6  | Hypo          | Iso                 | Avid homo   | +                 | -               | -             | Hyper | 0.91 | 1.14  |
| Fibroblastic          | Frontal lobe, left      | 7.1 × .6.6 | Iso           | Hyper               | Avid inhom  | ++                | +               | -             | Hyper | 0.86 | 1.23  |
| Fibroblastic          | Temporal lobe, right    | 2.3 × 1.3  | Iso           | Hyper               | Avid homo   | -                 | -               | -             | Hyper | 0.92 | 1.28  |
| Fibroblastic          | Posterior cranial fossa | 5.3 × 5.0  | Iso           | Hypo                | Avid inhom  | +                 | -               | -             | Hypo  | 0.84 | 1.08  |
| Fibroblastic          | Cerebellum, right       | 3.2 × 3.3  | Iso           | Iso                 | Avid homo   | -                 | -               | -             | Iso   | 0.87 | 1.18  |
| Fibroblastic          | Frontal lobe, right     | 5.6 × 4.7  | Hypo          | Hyper               | Avid homo   | ++                | -               | -             | Iso   | 1.08 | 1.38  |
| Fibroblastic          | Cerebellum, NOS         | 2.8 × 3.4  | Iso           | Iso                 | Mod homo    | -                 | -               | -             | Iso   | 0.77 | 1.03  |
| Fibroblastic          | Occipital lobe, right   | 1.8 × 1.4  | Iso           | Iso                 | Avid homo   | -                 | -               | -             | Hyper | 0.82 | 1.11  |
| Fibroblastic          | Parietal lobe, right    | 2.3 × 1.8  | Hypo          | Hyper               | Avid homo   | -                 | -               | -             | Hyper | 0.63 | 0.84  |
| Fibroblastic          | Temporal lobe, right    | 5.2 × 2.7  | Iso           | Iso                 | Avid homo   | +                 | -               | +             | Iso   | 0.95 | 1.28  |
| Fibroblastic          | Posterior cranial fossa | 2.5 × 2.1  | Iso           | Hyper               | Avid homo   | +                 | -               | -             | Hyper | 0.75 | 1.03  |
| Fibroblastic          | Frontal lobe, left      | 1.4 × 1.2  | Iso           | Iso                 | Avid homo   | -                 | -               | -             | Iso   | 0.77 | 1.04  |
| Lymphoplasmacyte-rich | Parietal lobe, right    | 2.5 × 1.7  | Iso           | Hyper               | Avid homo   | -                 | -               | -             | Hyper | 0.62 | 0.84  |
| Meningothelial        | Brain, NOS              | 5.8 × 6.5  | Iso           | Iso                 | Avid homo   | -                 | -               | -             | Hyper | 0.62 | 0.90  |
| Meningothelial        | Temporalis muscle       | 6.6 × 6.5  | Iso           | Hyper               | Avid homo   | -                 | -               | +             | Iso   | 0.99 | 1.24  |
| Meningothelial        | Sella                   | 1.8 × 2.5  | Hypo          | Hyper               | Avid homo   | -                 | -               | -             | Iso   | 0.95 | 1.30  |
| Meningothelial        | Parafalcine             | 4.5 × 5.9  | Iso           | Iso                 | Avid homo   | -                 | -               | -             | Hyper | 0.68 | 0.99  |
| Meningothelial        | Parafalcine             | 5.1 × 4.2  | Iso           | Iso                 | Avid inhom  | +                 | +               | -             | Iso   | 0.87 | 1.21  |
| Meningothelial        | Frontal lobe, left      | 3.2 × 3.2  | Iso           | Iso                 | Avid homo   | ++                | -               | -             | Hyper | 0.91 | 1.17  |
| Meningothelial        | Frontal lobe, left      | 6.4 × 6.5  | Iso           | Iso                 | Mod homo    | ++                | -               | -             | Iso   | 0.80 | 1.07  |
| Meningothelial        | Frontal lobe, right     | 6.0 × 3.5  | Hypo          | Iso                 | Avid inhom  | +                 | +               | -             | Hypo  | 0.73 | 0.95  |
| Meningothelial        | Tentorium cerebelli     | 2.1 × 0.9  | Iso           | Iso                 | Avid homo   | -                 | -               | -             | Iso   | 0.93 | 1.24  |
| Meningothelial        | Cerebellopontine angle  | 2.1 × 2.2  | Iso           | Hyper               | Avid homo   | -                 | -               | -             | Hyper | 0.92 | 1.19  |
| Meningothelial        | Frontal lobe, left      | 2.7 × 2.8  | Iso           | Iso                 | Avid homo   | ++                | -               | -             | Iso   | 0.88 | 1.19  |
| Meningothelial        | Falx cerebri            | 4.1 × 1.9  | Iso           | Iso                 | Avid homo   | ++                | -               | -             | Iso   | 0.75 | 1.03  |
| Meningothelial        | Temporal lobe, right    | 2.2 × 1.6  | Iso           | Iso                 | Avid homo   | +                 | -               | -             | Iso   | 0.88 | 1.19  |
| Meningothelial        | Temporal lobe, right    | 6.5 × 5.9  | Iso           | Hyper               | Avid homo   | +++               | -               | -             | Hyper | 0.78 | 1.05  |
| Meningothelial        | Parietal lobe, left     | 1.4 × 0.8  | Iso           | Hyper               | Avid homo   | -                 | -               | -             | Hyper | 1.09 | 1.42  |
| Meningothelial        | Frontal lobe, NOS       | 7.0 × 6.9  | Iso           | Iso                 | Avid inhom  | +                 | +               | -             | Hyper | 0.69 | 0.9   |
| Meningothelial        | Temporal lobe, left     | 3.9 × 4.0  | Iso           | Hypo                | Avid inhom  | +                 | +               | -             | Hypo  | 0.92 | 1.26  |
| Meningothelial        | Frontal lobe, right     | 1.2 × 1.2  | Iso           | Iso                 | Avid homo   | +                 | -               | -             | Iso   | 0.90 | 1.22  |
| Meningothelial        | Cerebellopontine angle  | 2.3 × 2.5  | Iso           | Hyper               | Avid homo   | -                 | -               | -             | Hyper | 0.87 | 1.18  |
| Meningothelial        | Frontal lobe, left      | 1.2 × 0.7  | Iso           | Iso                 | Avid homo   | -                 | -               | -             | Iso   | 0.76 | 0.99  |
| Meningothelial        | Parietal lobe, left     | 4.3 × 2.9  | Iso           | Hyper               | Avid homo   | +++               | -               | -             | Iso   | 1.06 | 1.34  |
| Meningothelial        | Temporal lobe, right    | 1.3 × 1.6  | Iso           | Hyper               | Avid homo   | -                 | -               | -             | Iso   | 1.02 | 1.34  |
| Meningothelial        | Parietal lobe, left     | 4.2 × 4.5  | Iso           | Hyper               | Avid homo   | +++               | -               | -             | Hyper | 0.81 | 1.08  |
| Meningothelial        | Cerebellopontine angle  | 2.3 × 2.6  | Iso           | Hyper               | Avid homo   | -                 | -               | -             | Iso   | 0.95 | 1.30  |
| Meningothelial        | Temporal lobe, left     | 2.1 × 2.4  | Iso           | Iso                 | Avid inhom  | -                 | +               | +             | Iso   | 0.90 | 1.23  |
| Meningothelial        | Temporal lobe, right    | 4.5 × 5.2  | Iso           | Iso                 | Avid inhom  | +                 | -               | +             | Iso   | 0.97 | 1.31  |
| Meningothelial        | Posterior cranial fossa | 1.5 × 1.9  | Iso           | Iso                 | Avid homo   | -                 | -               | -             | Iso   | 0.98 | 1.29  |
| Meningothelial        | Parietal lobe, left     | 3.8 × 4.0  | Iso           | Hyper               | Avid homo   | -                 | -               | -             | Hyper | 0.77 | 1.04  |
| Meningothelial        | Temporal lobe, right    | 3.9 × 3.5  | Iso           | Iso                 | Avid homo   | -                 | -               | +             | Iso   | 0.85 | 1.15  |
| Meningothelial        | Frontal lobe, right     | 2.6 × 3.0  | Iso           | Iso                 | Avid inhom  | ++                | -               | -             | Iso   | 0.81 | 1.05  |
| Meningothelial        | Anterior cranial fossa  | 2.1 × 1.7  | Iso           | Iso                 | Avid homo   | -                 | -               | -             | Hyper | 0.68 | 0.92  |
| Meningothelial        | Temporal lobe, left     | 2.1 × 2.2  | Iso           | Iso                 | Avid homo   | +                 | -               | -             | Iso   | 0.81 | 1.09  |
| Meningothelial        | Base of skull           | 2.7 × 2.9  | Iso           | Iso                 | Avid homo   | +                 | -               | -             | Hyper | 0.78 | 1.05  |
| Meningothelial        | Parietal lobe, right    | 2.5 × 2.5  | Iso           | Hyper               | Avid homo   | +                 | -               | -             | Hyper | 0.82 | 1.08  |
| Meningothelial        | Frontal lobe, left      | 3.2 × 2.9  | Iso           | Iso                 | Avid homo   | ++                | -               | -             | Iso   | 0.81 | 1.05  |
| Meningothelial        | Posterior cranial fossa | 3.5 × 3.1  | Iso           | Iso                 | Avid homo   | -                 | -               | -             | Iso   | 0.98 | 1.27  |
| Meningothelial        | Cerebellopontine angle  | 1.9 × 2.1  | Iso           | Hyper               | Avid homo   | -                 | -               | -             | Iso   | 0.92 | 1.23  |
| Meningothelial        | Sphenoid bone           | 3.1 × 3.2  | Iso           | Iso                 | Avid homo   | -                 | -               | -             | Iso   | 0.94 | 1.24  |
| Metaplastic           | Frontal lobe, left      | 2.9 × 2.8  | Iso           | Iso                 | Avid homo   | ++                | -               | -             | Iso   | 0.89 | 1.19  |
| Metaplastic           | Parietal lobe, left     | 2.5 × 3.1  | Iso           | Hyper               | Avid homo   | +                 | -               | -             | Hyper | 1.00 | 1.300 |
| Microcystic           | Frontal lobe, left      | 4.0 × 5.1  | Iso           | Iso                 | Avid homo   | +++               | +               | -             | Iso   | 1.20 | 1.58  |
| Microcystic           | Frontal lobe, left      | 4.5 × 3.0  | Hypo          | Hyper               | Avid homo   | +++               | -               | -             | Hyper | 0.97 | 1.18  |
| Microcystic           | Brain, NOS              | 4.3 × 3.2  | Hyper         | Hyper               | Avid homo   | ++                | +               | -             | Hyper | 1.21 | 1.53  |
| Microcystic           | Parietal lobe, left     | 1.2 × .7   | Iso           | Hyper               | Avid homo   | -                 | -               | -             | Hyper | 1.21 | 1.57  |
| Microcystic           | Frontal lobe, right     | 2.2 × 1.4  | Iso           | Iso                 | Avid homo   | -                 | -               | -             | Iso   | 1.05 | 1.35  |
| Secretory             | Parietal lobe, left     | 4.9 × 2.2  | Iso           | Iso                 | Avid homo   | +++               | -               | -             | Iso   | 1.06 | 1.33  |
| Secretory             | Temporal lobe, left     | 2.6 × 3.1  | Iso           | Hyper               | Avid homo   | +++               | -               | -             | Hyper | 1.09 | 1.38  |
| Secretory             | Frontal lobe, right     | 4.4 × 4.1  | Iso           | Hyper               | Avid homo   | +++               | -               | -             | Iso   | 1.07 | 1.41  |
| Transitional          | Cerebellopontine angle  | 2.3 × 2.2  | Iso           | Iso                 | Avid homo   | -                 | -               | -             | Iso   | 0.86 | 1.10  |
| Transitional          | Brain, NOS              | 2.4 × 1.6  | Iso           | Iso                 | Avid homo   | -                 | -               | -             | Hyper | 0.93 | 1.18  |
| Transitional          | Posterior cranial fossa | 5.5 × 5.4  | Iso           | Iso                 | Avid inhom  | +                 | +               | -             | Iso   | 0.84 | 1.17  |

Continued on next page

**On-line Table 2: Continued**

| Subtype      | Location                | Size (cm) | T1 Appearance | T2/FLAIR Appearance | Enhancement | Peritumoral Edema | Cystic Necrosis | Bone Invasion | DWI   | ADC  | NADC |
|--------------|-------------------------|-----------|---------------|---------------------|-------------|-------------------|-----------------|---------------|-------|------|------|
| Transitional | Frontal lobe, left      | 2.5 × 2.2 | Iso           | Iso                 | Avid homo   | —                 | —               | —             | Hyper | 0.85 | 1.13 |
| Transitional | Sphenoid bone           | 1.4 × 1.3 | Iso           | Iso                 | Avid homo   | —                 | —               | —             | Iso   | 0.71 | 0.96 |
| Transitional | Frontal lobe, left      | 1.2 × 1.3 | Iso           | Iso                 | Avid homo   | —                 | —               | —             | Iso   | 0.82 | 1.12 |
| Transitional | Parietal lobe, right    | 1.6 × 1.4 | Iso           | Iso                 | Avid homo   | —                 | —               | —             | Iso   | 0.85 | 1.13 |
| Transitional | Frontal lobe, left      | 3.1 × 2.4 | Iso           | Hyper               | Avid homo   | —                 | —               | —             | Hyper | 0.67 | 0.96 |
| Transitional | Temporal lobe, left     | 3.1 × 3.8 | Iso           | Iso                 | Avid homo   | +                 | —               | —             | Iso   | 0.86 | 1.15 |
| Transitional | Posterior cranial fossa | 3.3 × 3.0 | Iso           | Iso                 | Avid homo   | —                 | —               | —             | Iso   | 0.91 | 1.21 |
| Transitional | Frontal lobe, left      | 4.0 × 2.7 | Iso           | Iso                 | Avid homo   | —                 | —               | —             | Iso   | 0.89 | 1.20 |
| Transitional | Posterior cranial fossa | 3.5 × 3.3 | Iso           | Iso                 | Avid homo   | +                 | —               | —             | Iso   | 0.93 | 1.24 |
| Transitional | Parietal lobe, right    | 2.2 × 2.1 | Iso           | Iso                 | Avid homo   | —                 | —               | —             | Hyper | 0.81 | 1.11 |
| Transitional | Falx cerebri            | 2.2 × 1.9 | Iso           | Iso                 | Avid homo   | —                 | —               | —             | Iso   | 0.72 | 0.99 |
| Transitional | Frontal lobe, left      | 2.1 × 2.0 | Iso           | Iso                 | Avid homo   | —                 | —               | —             | Iso   | 0.76 | 1.04 |

**Note:**—inhomo indicates inhomogeneous; Mod, moderate; NOS, not otherwise specified; homo, homogeneous; Hyper, hyperintensity; Hypo, hypointensity; Iso, isointensity; +, mild; ++, moderate; +++, severe; —, absent.

**On-line Table 3: WHO Grade II meningiomas (nonchordoid)**

| Subtype    | Location                         | Size (cm) | T1 Appearance | T2/FLAIR Appearance | Enhancement     | Peritumoral Edema | Cystic Necrosis | Bone Invasion | DWI   | ADC  | NADC |
|------------|----------------------------------|-----------|---------------|---------------------|-----------------|-------------------|-----------------|---------------|-------|------|------|
| Atypical   | Frontal lobe, right              | 6.5 × 5.0 | Hypo          | Iso                 | Avid inhomo     | +++               | +               | —             | Iso   | 0.96 | 1.28 |
| Atypical   | Brain, NOS                       | 4.1 × 3.5 | Iso           | Hypo                | Avid homo       | ++                | —               | —             | Hypo  | 0.93 | 1.26 |
| Atypical   | Frontal lobe, right              | 6.8 × 6.0 | Iso           | Iso                 | Avid inhomo     | ++                | +               | —             | Hyper | 0.94 | 1.27 |
| Atypical   | Brain, NOS                       | 4.0 × 4.3 | Iso           | Hyper               | Avid homo       | ++                | —               | —             | Hyper | 0.86 | 1.18 |
| Atypical   | Frontal lobe, right              | 6.6 × 5.1 | Iso           | Iso                 | Avid inhomo     | +                 | +               | ++            | Hyper | 0.70 | 0.88 |
| Atypical   | Temporal lobe, right             | 2.9 × 2.8 | Hypo          | Iso                 | Avid peripheral | ++                | ++              | —             | Hyper | 0.75 | 0.94 |
| Atypical   | Posterior frontal lobe, right    | 3.8 × 2.8 | Hypo          | Iso                 | Avid homo       | +++               | —               | —             | Hyper | 0.85 | 1.16 |
| Atypical   | Posterior cranial fossa, right   | 3.3 × 3.4 | Iso           | Iso                 | Inhomo          | +                 | +               | —             | Iso   | 0.88 | 1.13 |
| Atypical   | Posterior cranial fossa, left    | 5.5 × 7.1 | Iso           | Iso                 | Avid homo       | ++                | —               | —             | Iso   | 0.75 | 1.06 |
| Atypical   | Temporal lobe, left              | 4.6 × 2.4 | Iso           | Iso                 | Avid inhomo     | ++                | —               | ++            | Iso   | 0.79 | 1.08 |
| Atypical   | Frontal lobe, left posterior     | 3.5 × 4.0 | Hypo          | Hyper               | Avid inhomo     | —                 | —               | —             | Hyper | 0.72 | 0.92 |
| Atypical   | Tentorium cerebelli, right       | 2.9 × 3.0 | Iso           | Iso                 | Avid homo       | ++                | —               | —             | Iso   | 0.83 | 1.06 |
| Atypical   | Parietal lobe, right parafalcine | 4.1 × 1.4 | Iso           | Iso                 | Avid homo       | ++                | —               | —             | Iso   | 0.70 | 0.88 |
| Atypical   | Parietal lobe, right             | 4.8 × 4.0 | Hypo          | Hyper               | Avid homo       | —                 | —               | —             | Hyper | 0.88 | 1.13 |
| Atypical   | Parietal/parafalcine, right      | 5.0 × 4.4 | Iso           | Hyper               | Avid homo       | +                 | —               | —             | Iso   | 0.93 | 1.19 |
| Atypical   | Frontal lobe, left               | 6.5 × 8.1 | Hyper         | Iso                 | Avid homo       | ++                | +               | —             | Iso   | 0.86 | 1.16 |
| Atypical   | Cerebellopontine angle           | 2.0 × 3.7 | Iso           | Hyper               | Avid homo       | ++                | —               | —             | Iso   | 1.05 | 1.28 |
| Atypical   | Posterior cranial fossa          | 3.7 × 4.3 | Iso           | Iso                 | Avid homo       | —                 | +               | —             | Iso   | 0.61 | 0.78 |
| Atypical   | Frontal lobe, left               | 5.2 × 6.3 | Iso           | Hyper               | Avid inhomo     | +                 | ++              | —             | Iso   | 0.90 | 1.22 |
| Atypical   | Frontal lobe, left               | 6.7 × 5.6 | Iso           | Iso                 | Avid inhomo     | +++               | +               | —             | Hypo  | 0.94 | 1.25 |
| Clear cell | Cerebellopontine angle           | 3.8 × 4.2 | Hypo          | Iso                 | Mod homo        | —                 | —               | —             | Iso   | 0.85 | 1.18 |

**Note:**—inhomo indicates inhomogeneous; Mod, moderate; NOS, not otherwise specified; homo, homogeneous; Hyper, hyperintensity; Hypo, hypointensity; Iso, isointensity; +, mild; ++, moderate; +++, severe; —, absent.

**On-line Table 4: WHO Grade III meningioma**

| Subtype    | Location           | Size (cm) | T1 Appearance | T2/FLAIR Appearance | Enhancement | Peritumoral Edema | Cystic Necrosis | Bone Invasion | DWI   | ADC  | NADC |
|------------|--------------------|-----------|---------------|---------------------|-------------|-------------------|-----------------|---------------|-------|------|------|
| Anaplastic | Frontal lobe, left | 4.7 × 2.9 | Hypo          | Hyper               | Mild inhomo | +                 | —               | —             | Hyper | 0.57 | 0.75 |

**Note:**—Hypo indicates hypointensity; Hyper, hyperintensity; inhomo, inhomogeneous; +, mild; —, absent.
